# Supplementary material
Source: MDPI journal article supplement (https://www.mdpi.com/1999-4907/10/5/446)
Supplement: s1 [file s1]

**Supplementary Table 1. Analysis of variance of macro-cutting survival.**

| <b>Source of Variation</b>    | <b>Degrees of Freedom</b> | <b>Sum of Squares</b> | <b>Mean Square</b> | <b>F Ratio</b> | <b>P Level</b> |
|-------------------------------|---------------------------|-----------------------|--------------------|----------------|----------------|
| Variety                       | 3                         | .005350               | .001783            | 1.69           | 0.190          |
| Propagation Method            | 1                         | .000341               | .000341            | 0.32           | 0.574          |
| Variety-by-Propagation Method | 3                         | .001512               | .000504            | 0.48           | 0.701          |
| Error                         | 32                        | .033863               | .001058            |                |                |
| Total                         | 39                        | .041066               |                    |                |                |
